# Supplementary material for: Iodine Concentration in Drinking Water in the Same or Different Seasons of the Year in Brazilian Macroregions
Source: J Nutr Metab. 2022 Aug 4;2022:7227511. doi: 10.1155/2022/7227511 (PMC11401693; doi:10.1155/2022/7227511)
Supplement: Supplementary file 1 — Supplementary Materials Two files are included in “Supplementary Files.” The files refer to the statistical analyses used to compare the concentration of iodine in drinking water between the climatic seasons of the same location and in the same climatic seasons between different locations. The file entitled “Results of Article Part 1‐Statistical Analysis” shows the comparison tests used to compare the concentration of iodine in drinking water between the climatic seasons of the same location. The other file entitled “Results of Article Part 2‐Statistical Analysis” shows the comparison tests used to compare the concentration of iodine in drinking water in the same climate stations between different locations in Brazilian macroregions. [file JNME-2022-7227511-s001.zip]

Archive with 2 entries (2 files):
- 7227511.f1/ARTICLE RESULTS PART  2 - STATISTICAL ANALYSIS.doc
- 7227511.f1/ARTICLE RESULTS PART 1 - STATISTICAL ANALYSIS.doc
